# Supplementary material for: Neural Correlates of a Perspective-taking Task Using in a Realistic Three-dimmensional Environment Based Task: A Pilot Functional Magnetic Resonance Imaging Study
Source: PubMed Central journal article supplement — Clin Psychopharmacol Neurosci. 2017 Aug 31;15(3):276–81. doi: 10.9758/cpn.2017.15.3.276 (PMC5565076; doi:10.9758/cpn.2017.15.3.276), 2017-08-31
Supplement: cpn-15-276_suppl.pdf [file cpn-15-276_suppl.pdf]

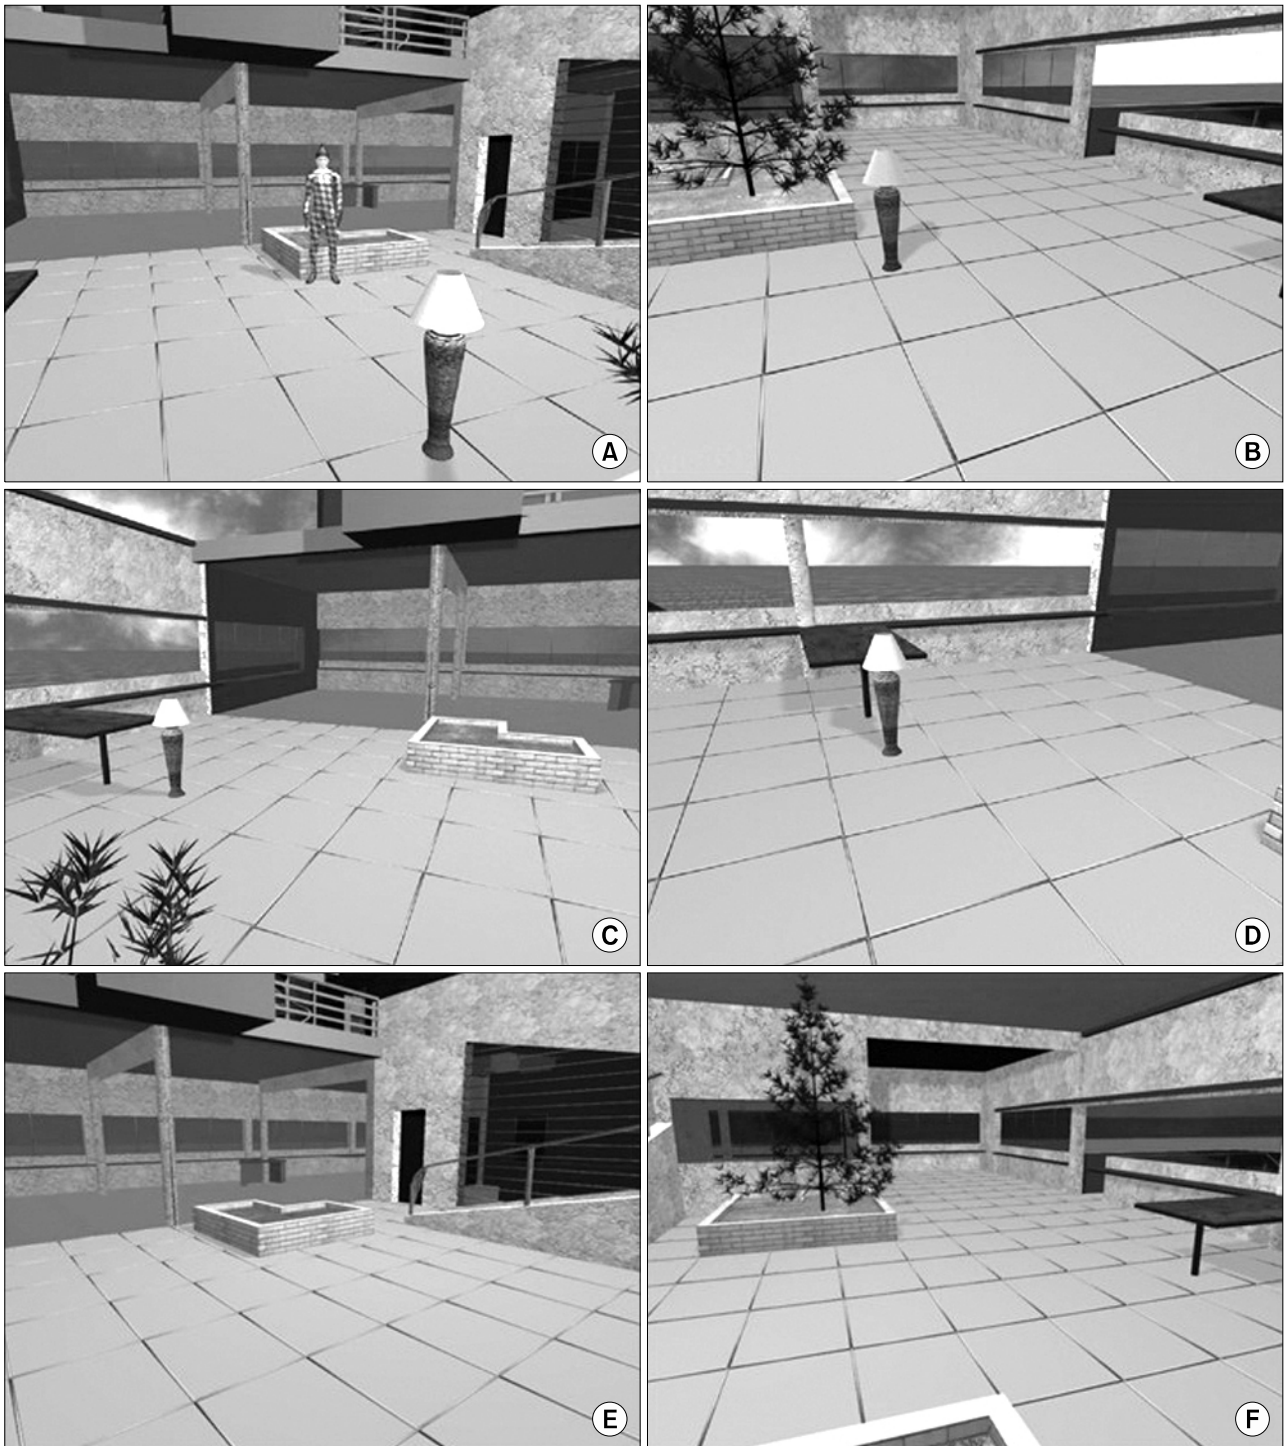

**Supplementary Fig. 1.** The stimuli used in the study. Examples of priming (A) and probe stimulus (B) used for the visual perspective taking task, priming (C) and probe stimulus (D) used for the object location memory task, and two example stimuli (E and F) used for the table task.
